# Supplementary material for: Successive Solvent Extraction of Polyphenols and Flavonoids from Cistus creticus L. Leaves
Source: MDPI journal article supplement (doi:10.3390/oxygen3030018), 2023-06-23
Supplement: s1 [file s1]

# Successive Solvent Extraction of Polyphenols and Flavonoids from *Cistus creticus* L. Leaves

Dimitrios Palaogiannis, Theodoros Chatzimitakos, Vassilis Athanasiadis, Eleni Bozinou, Dimitris P. Makris and Stavros I. Lalas \*

Department of Food Science & Nutrition, University of Thessaly, Terma N. Temponera Street, GR-43100 Karditsa, Greece

\* Correspondence: slalas@uth.gr; Tel.: +30-24410-64783

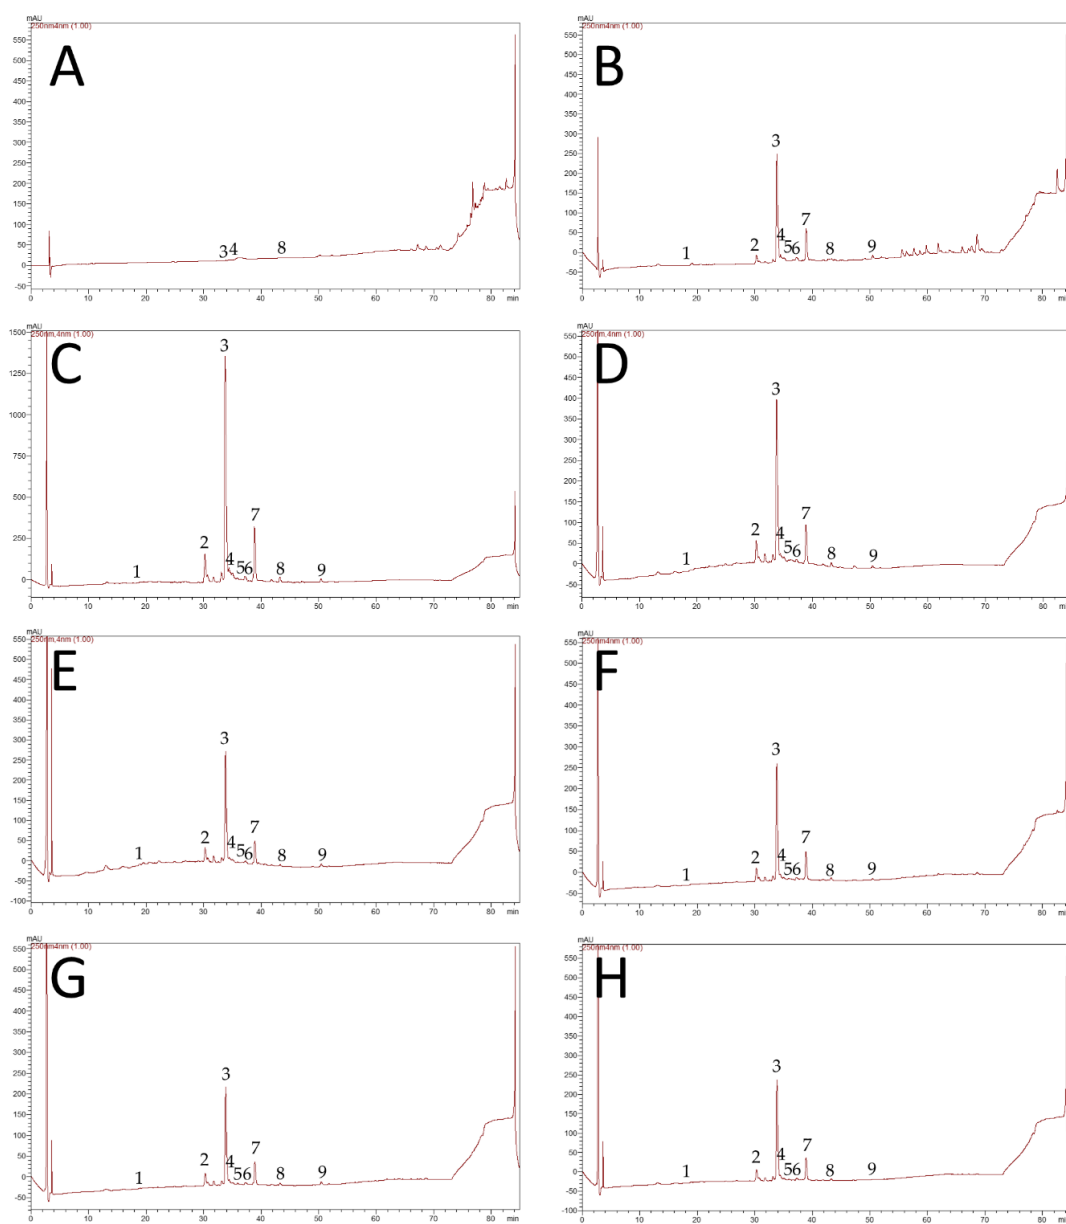

**Figure S1:** Chromatograms at 250 nm of the extract obtained using (A) hexane, (B) ethyl acetate, (C) acetone, (D) ethanol, and (E) water using the successive extraction procedure and (F) ethanol, (G) 50% *v/v* ethanol: water and (H) water, using the single-solvent extraction.; 1: Luteolin glucoside derivative, 2: 1\_Myricetin glucoside, 3: Myricetin rhamnoside, 4: 1\_Quercetin glucoside derivative, 5: Rutin, 6: 2\_Quercetin glucoside derivative, 7: Quercetin rhamnoside derivative, 8: 2\_Myricetin glucoside, 9: Luteolin 7-(2''-*p*-coumaroylglucoside).

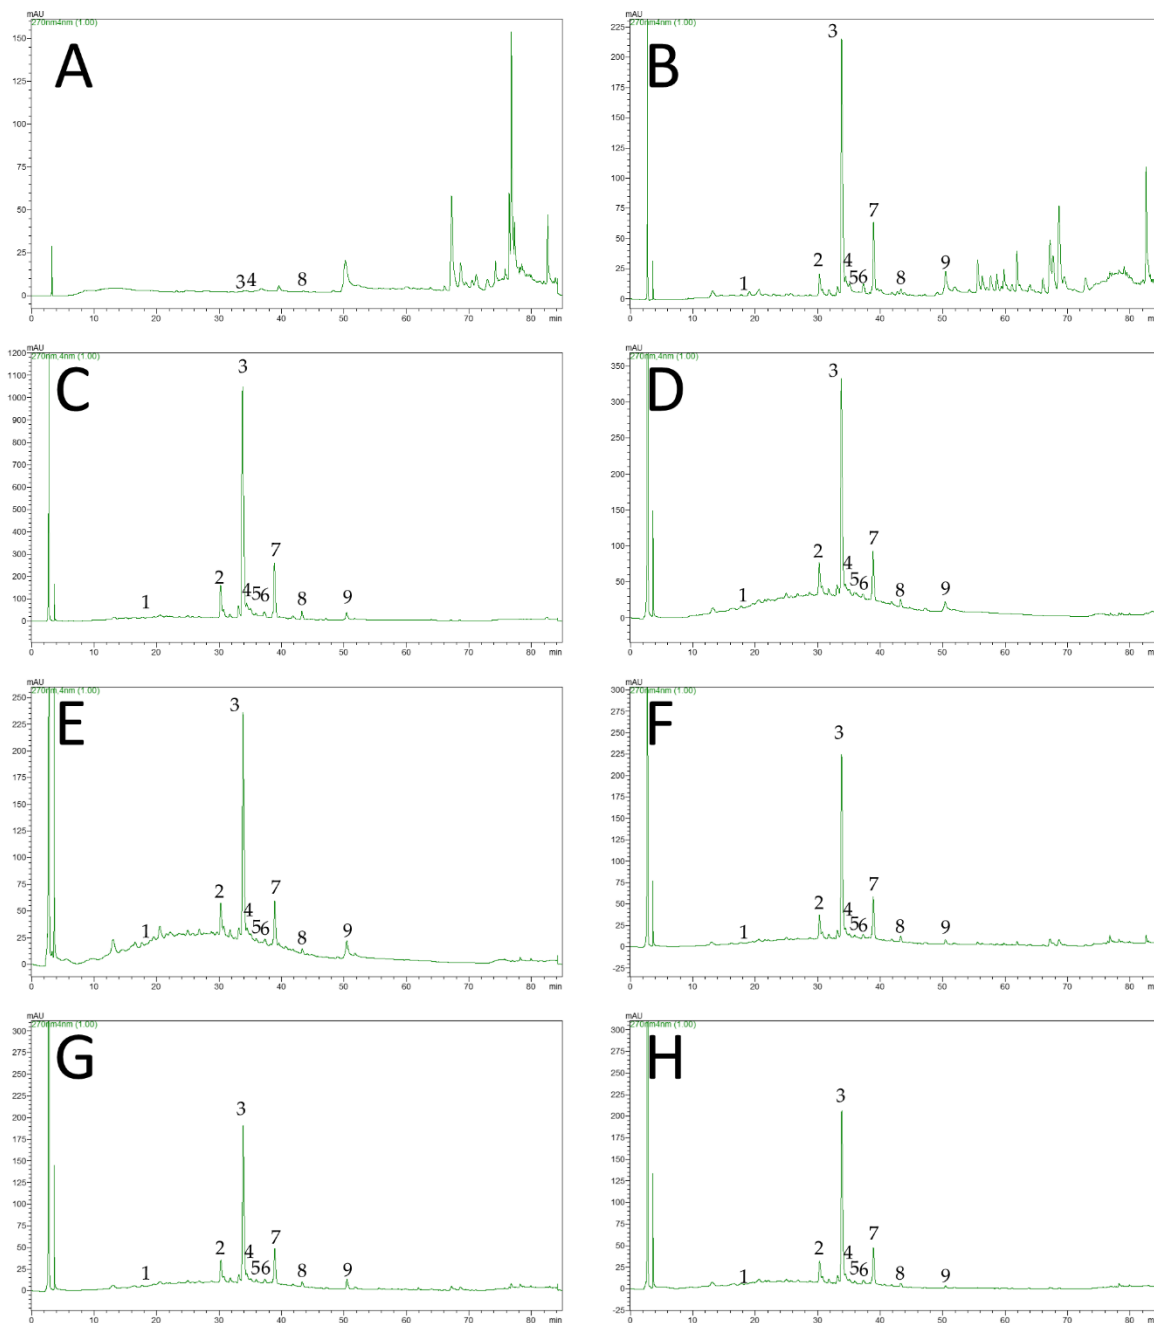

**Figure S2:** Chromatograms at 270 nm of the extract obtained using (A) hexane, (B) ethyl acetate, (C) acetone, (D) ethanol, and (E) water using the successive extraction procedure and (F) ethanol, (G) 50% *v/v* ethanol: water and (H) water, using the single-solvent extraction.; 1: Luteolin glucoside derivative, 2: 1\_Myricetin glucoside, 3: Myricetin rhamnoside, 4: 1\_Quercetin glucoside derivative, 5: Rutin, 6: 2\_Quercetin glucoside derivative, 7: Quercetin rhamnoside derivative, 8: 2\_Myricetin glucoside, 9: Luteolin 7-(2''-*p*-coumaroylglucoside).

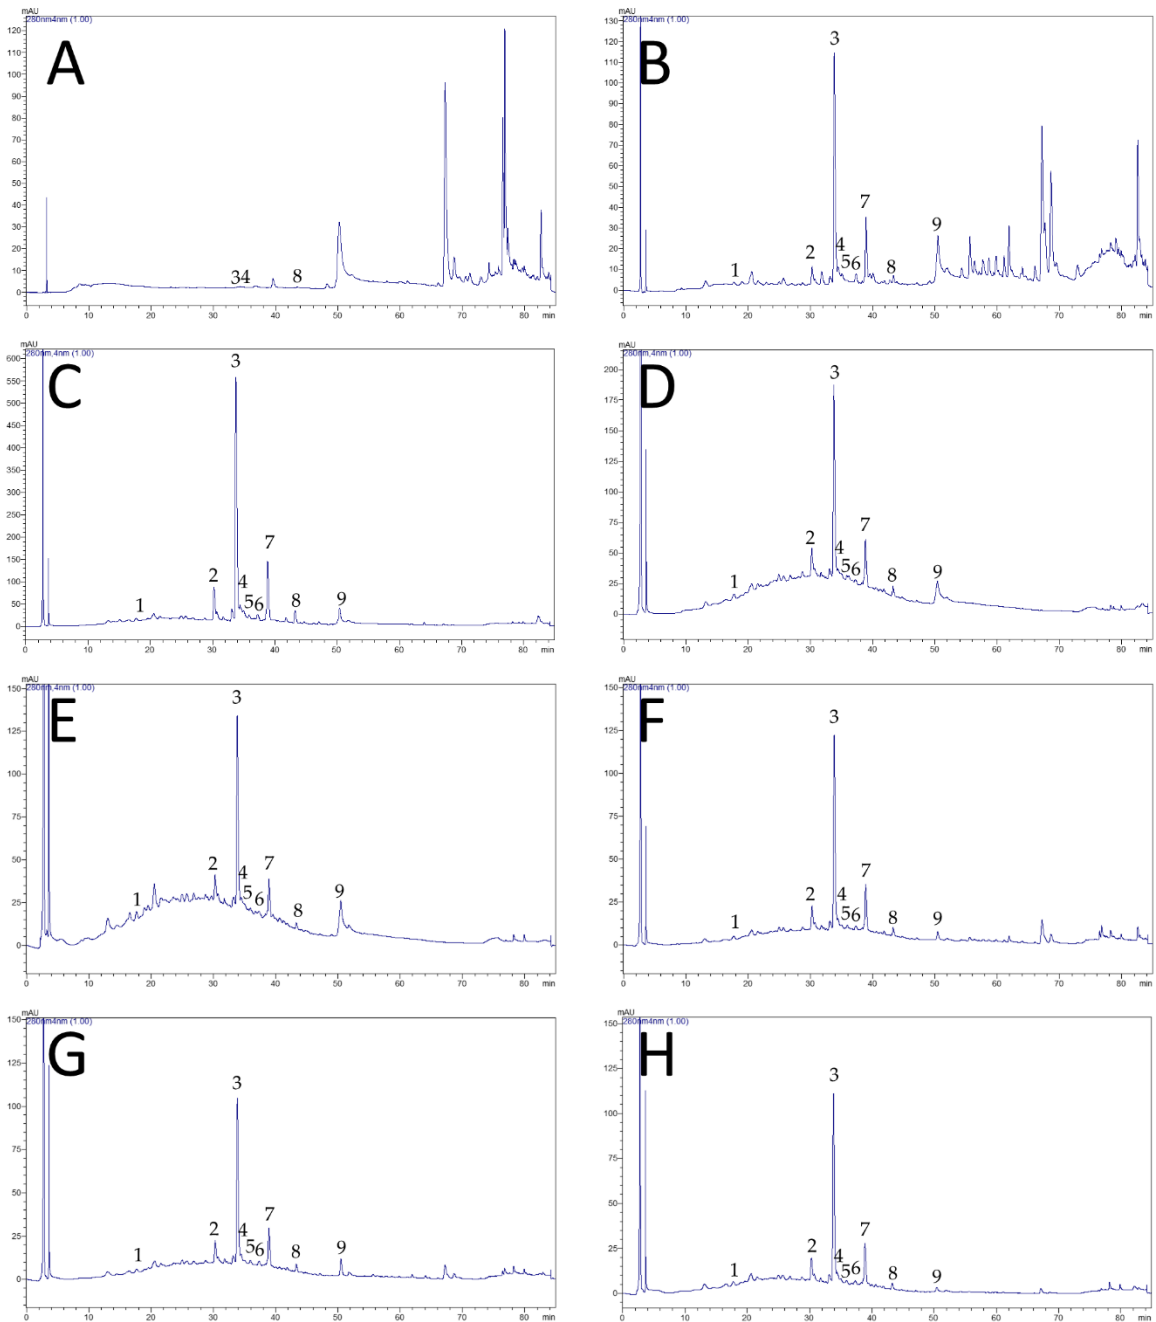

**Figure S3:** Chromatograms at 280 nm of the extract obtained using (A) hexane, (B) ethyl acetate, (C) acetone, (D) ethanol, and (E) water using the successive extraction procedure and (F) ethanol, (G) 50% *v/v* ethanol: water and (H) water, using the single-solvent extraction.; 1: Luteolin glucoside derivative, 2: 1-Myricetin glucoside, 3: Myricetin rhamnoside, 4: 1-Quercetin glucoside derivative, 5: Rutin, 6: 2-Quercetin glucoside derivative, 7: Quercetin rhamnoside derivative, 8: 2-Myricetin glucoside, 9: Luteolin 7-(2''-*p*-coumaroyl)glucoside).

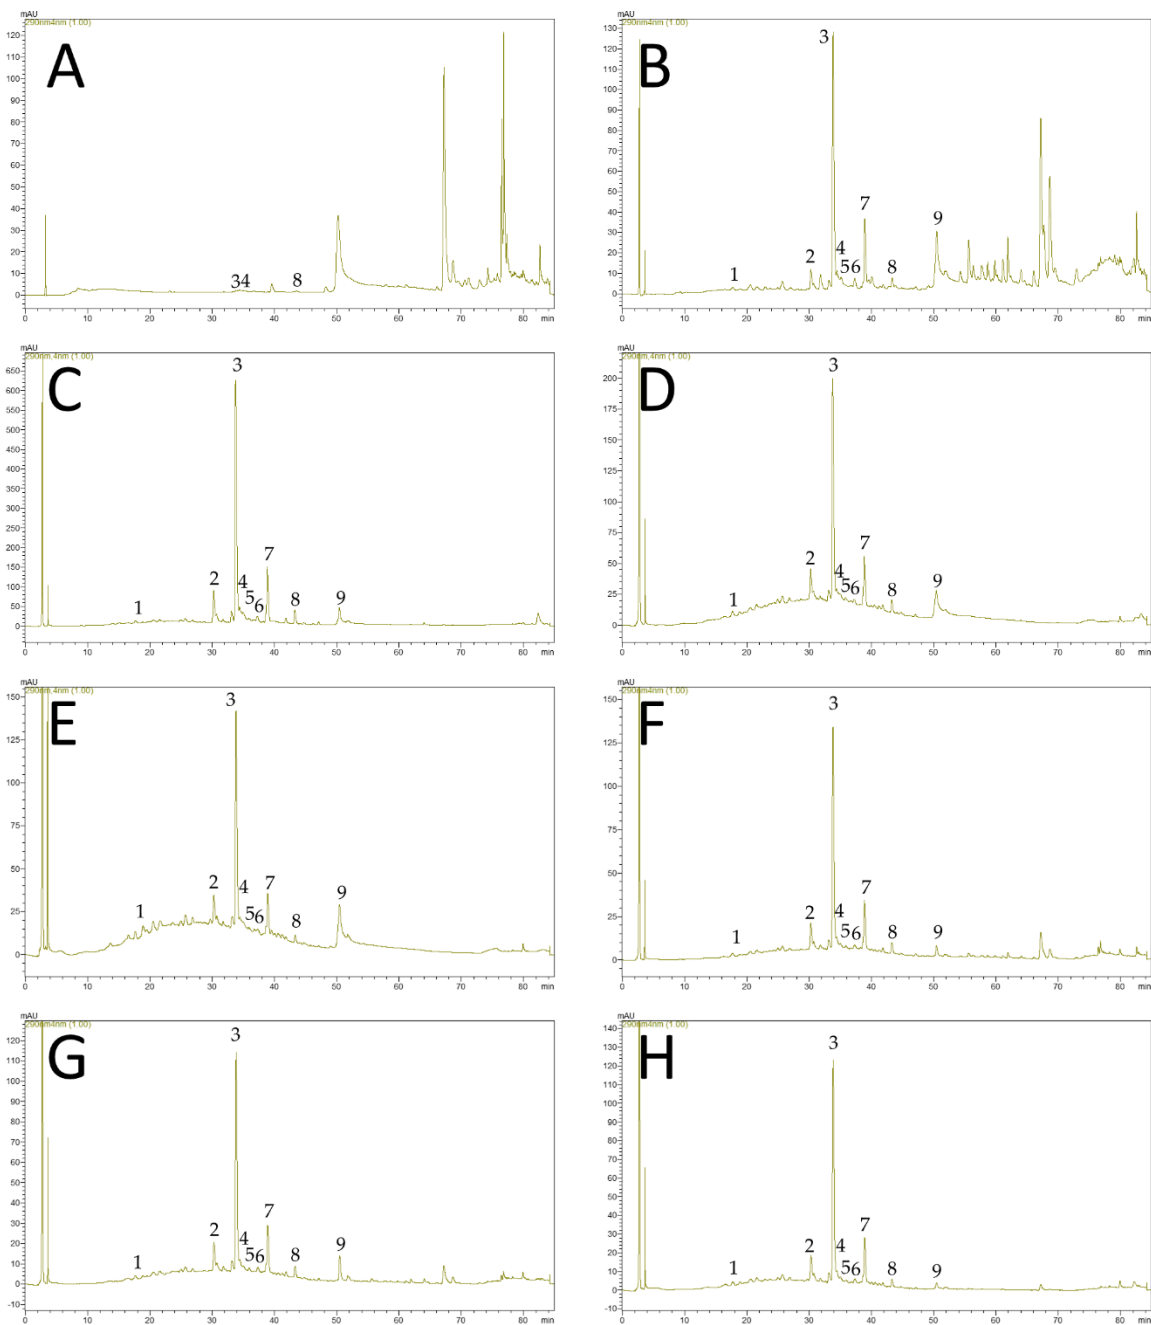

**Figure S4:** Chromatograms at 290 nm of the extract obtained using (A) hexane, (B) ethyl acetate, (C) acetone, (D) ethanol, and (E) water using the successive extraction procedure and (F) ethanol, (G) 50% *v/v* ethanol: water and (H) water, using the single-solvent extraction.; 1: Luteolin glucoside derivative, 2: 1-Myricetin glucoside, 3: Myricetin rhamnoside, 4: 1-Quercetin glucoside derivative, 5: Rutin, 6: 2-Quercetin glucoside derivative, 7: Quercetin rhamnoside derivative, 8: 2-Myricetin glucoside, 9: Luteolin 7-(2''-p-coumaroyl)glucoside).

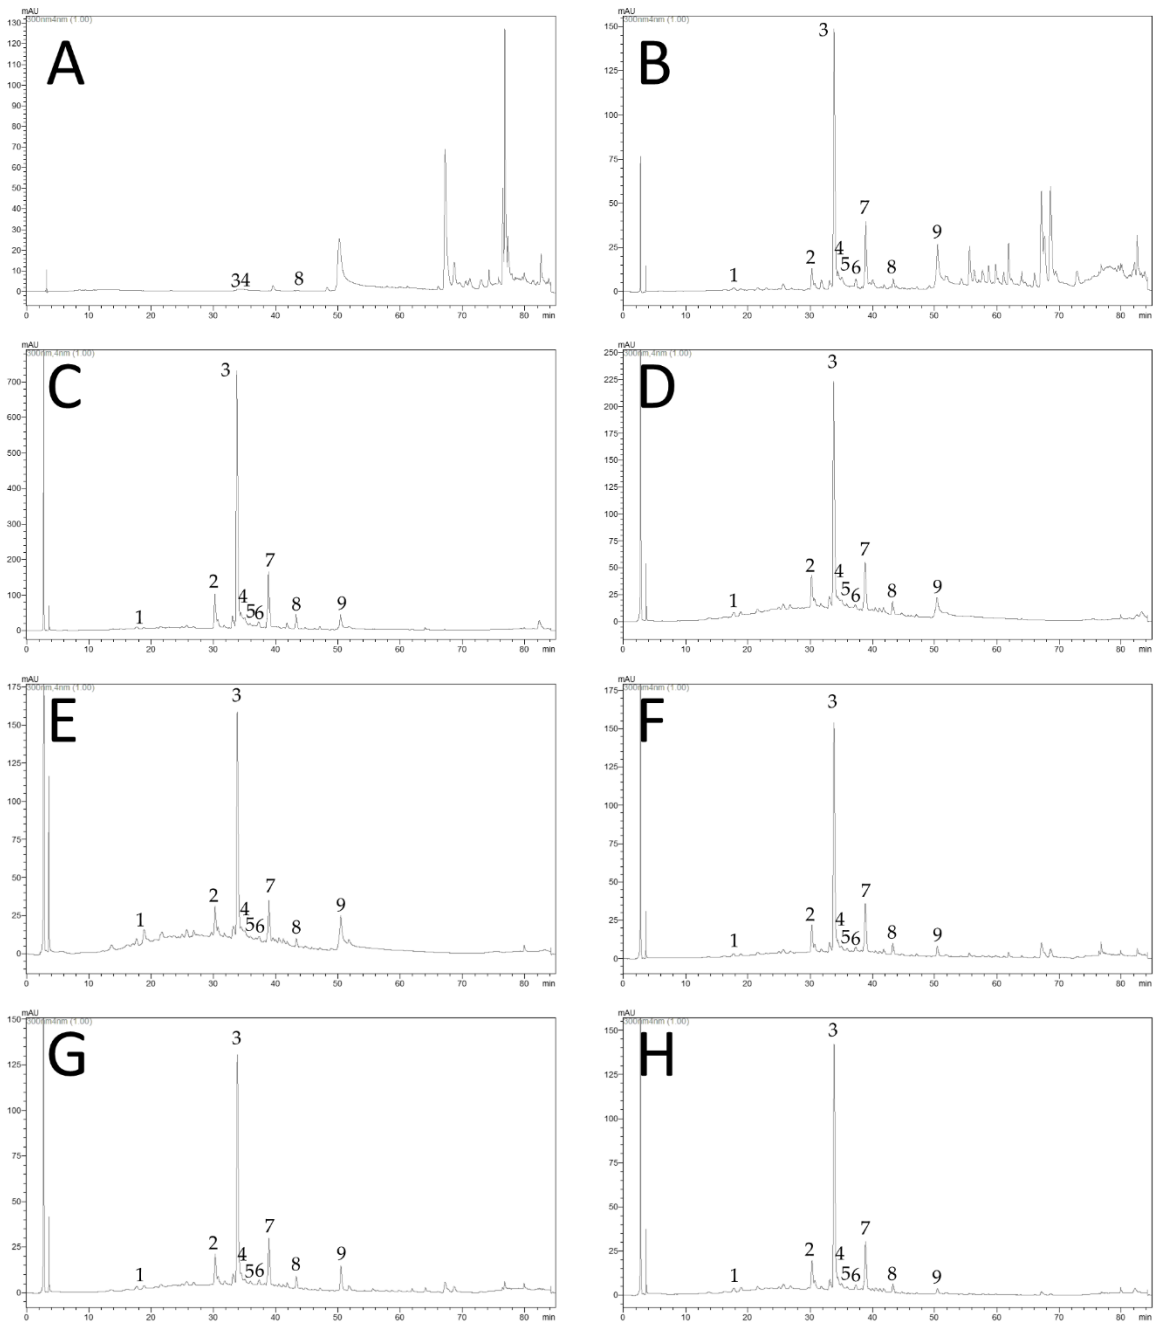

**Figure S5:** Chromatograms at 300 nm of the extract obtained using (A) hexane, (B) ethyl acetate, (C) acetone, (D) ethanol, and (E) water using the successive extraction procedure and (F) ethanol, (G) 50% *v/v* ethanol: water and (H) water, using the single-solvent extraction.; 1: Luteolin glucoside derivative, 2: 1-Myricetin glucoside, 3: Myricetin rhamnoside, 4: 1-Quercetin glucoside derivative, 5: Rutin, 6: 2-Quercetin glucoside derivative, 7: Quercetin rhamnoside derivative, 8: 2-Myricetin glucoside, 9: Luteolin 7-(2''-*p*-coumaroyl)glucoside).

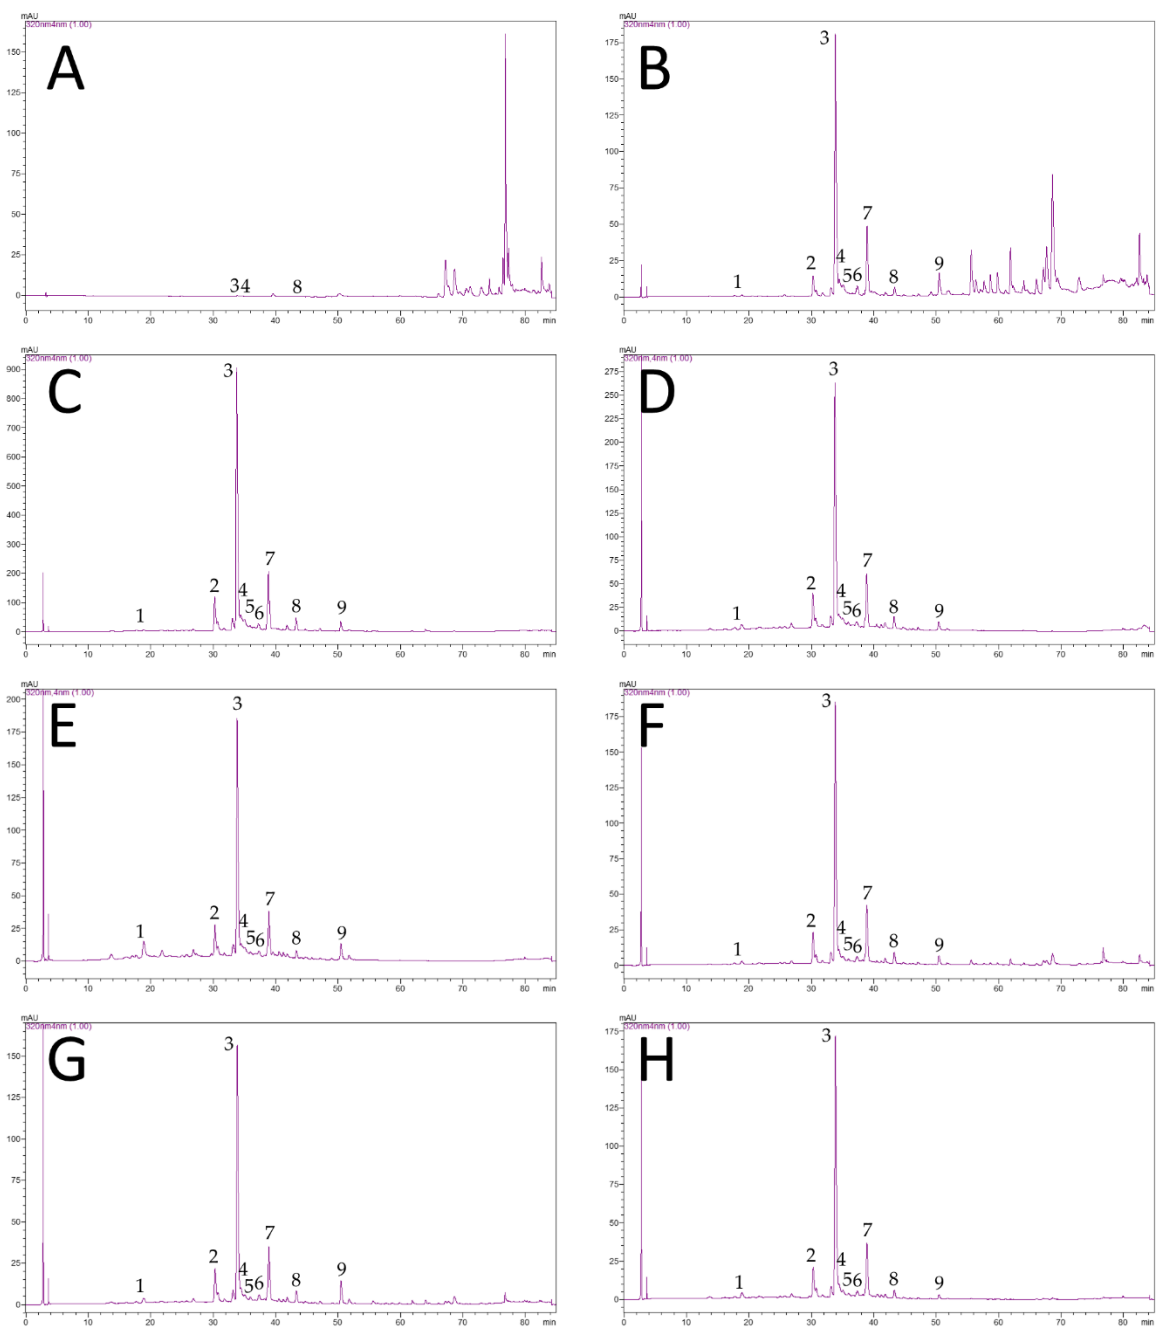

**Figure S6:** Chromatograms at 320 nm of the extract obtained using (A) hexane, (B) ethyl acetate, (C) acetone, (D) ethanol, and (E) water using the successive extraction procedure and (F) ethanol, (G) 50% *v/v* ethanol: water and (H) water, using the single-solvent extraction.; 1: Luteolin glucoside derivative, 2: 1-Myricetin glucoside, 3: Myricetin rhamnoside, 4: 1-Quercetin glucoside derivative, 5: Rutin, 6: 2-Quercetin glucoside derivative, 7: Quercetin rhamnoside derivative, 8: 2-Myricetin glucoside, 9: Luteolin 7-(2''-*p*-coumaroyl)glucoside).
